# Supplementary material for: Synthesis and facet-dependent enhanced photocatalytic activity of Bi2SiO5/AgI nanoplate photocatalysts
Source: Royal Society of Chemistry journal article supplement (doi:10.1039/c5ta03465e), 2015-01-01
Supplement: c5ta03465e1.pdf [file c5ta03465e1.pdf]

## Electronic Supplementary Information

# Synthesis and Facet-dependent Enhanced Photocatalytic Activity of Bi<sub>2</sub>SiO<sub>5</sub>/AgI Nanoplate Photocatalysts

*Zhen Wan<sup>a,b</sup> and Gaoke Zhang<sup>a,b\*</sup>*

<sup>a</sup>School of Resources and Environmental Engineering, Wuhan University of Technology, Wuhan, 430070, China.

<sup>b</sup>Hubei Provincial Collaborative Innovation Center for High Efficient Utilization of Vanadium Resources, Wuhan 430070, China.

E-mail: gkzhang@whut.edu.cn.

### Preparation of C-Bi<sub>2</sub>SiO<sub>5</sub> nanoplates and B-Bi<sub>2</sub>SiO<sub>5</sub> particles:

C-Bi<sub>2</sub>SiO<sub>5</sub> nanoplates were prepared following the same procedure of Bi<sub>2</sub>SiO<sub>5</sub> nanoplates besides adding 0.35 mmol of CTAB before adding ammonia solution. B-Bi<sub>2</sub>SiO<sub>5</sub> particles were synthesized through a solvothermal method. In a typical synthesis, a certain amount of Bi(NO<sub>3</sub>)<sub>3</sub>·5H<sub>2</sub>O (4 mmol) and Na<sub>2</sub>SiO<sub>3</sub>·9H<sub>2</sub>O (2 mmol) were dissolved in 70 mL of mixed solvent with triethanolamine and deionized water (volume ratio 1:6) under magnetic stirring. After stirring for 20 min, the mixture was transferred to a stainless steel Teflon-lined autoclave of 100 mL capacity. The autoclave was sealed and heated at 180 °C for 12 h and then cooled to room temperature naturally. The final products were collected by centrifugation, rinsed with distilled water and ethanol respectively, and dried at 70 °C for 5 h.

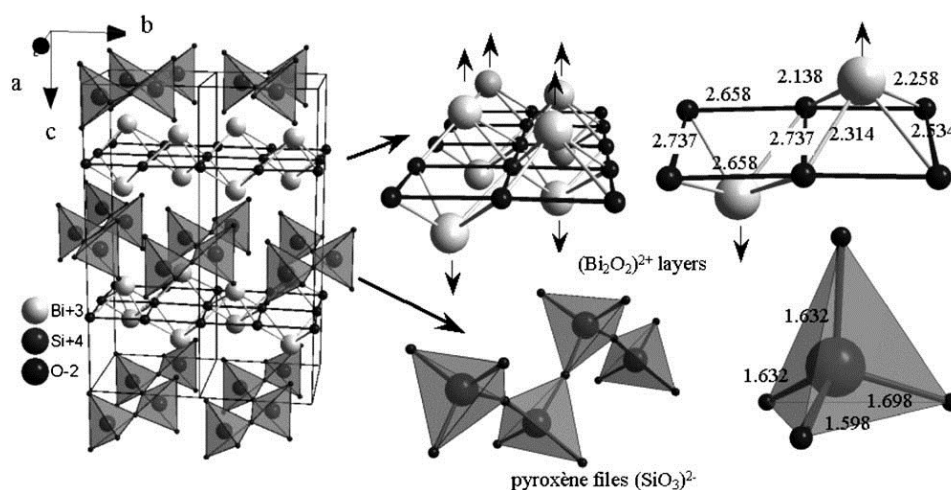

**Figure S1.** Structural representation of orthorhombic Bi<sub>2</sub>SiO<sub>5</sub> (from Ref. [9])

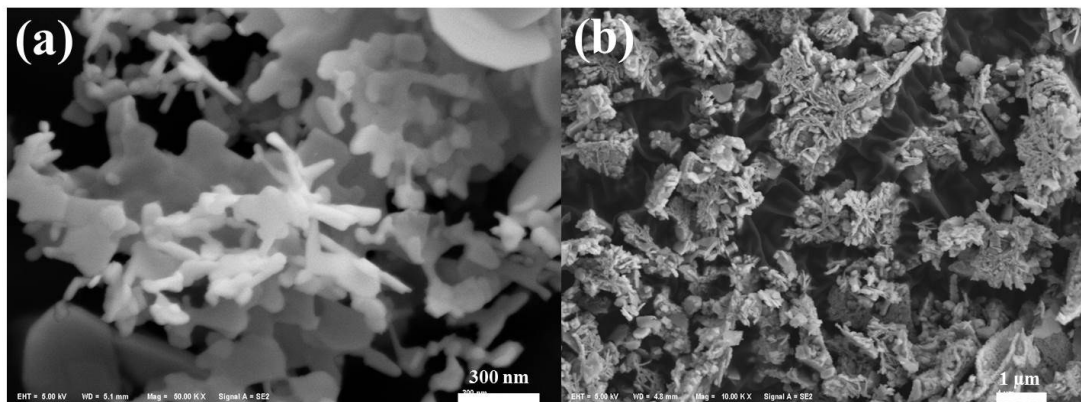

**Figure S2.** FE-SEM images of the (a) C-Bi<sub>2</sub>SiO<sub>5</sub>/AgI nanoplates and (b) B-Bi<sub>2</sub>SiO<sub>5</sub>/AgI particles.

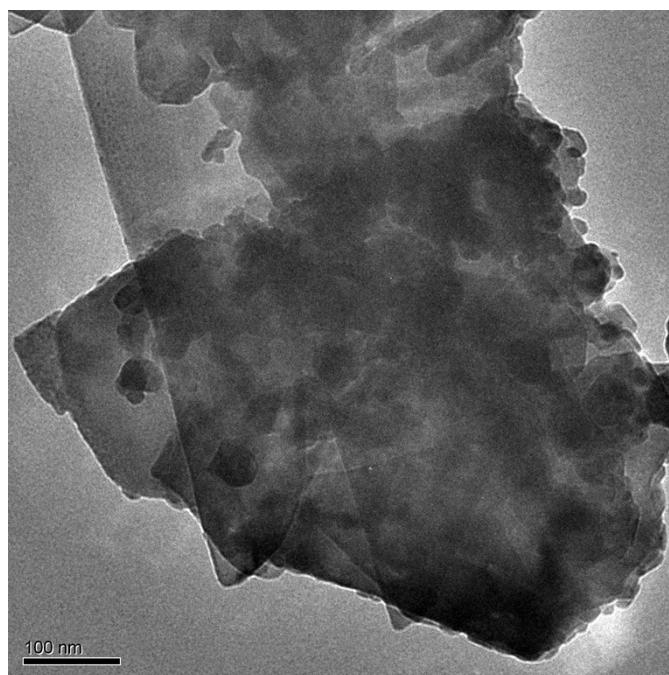

**Figure S3.** TEM image of the Bi<sub>2</sub>SiO<sub>5</sub>/AgI nanoplates (1B-A).

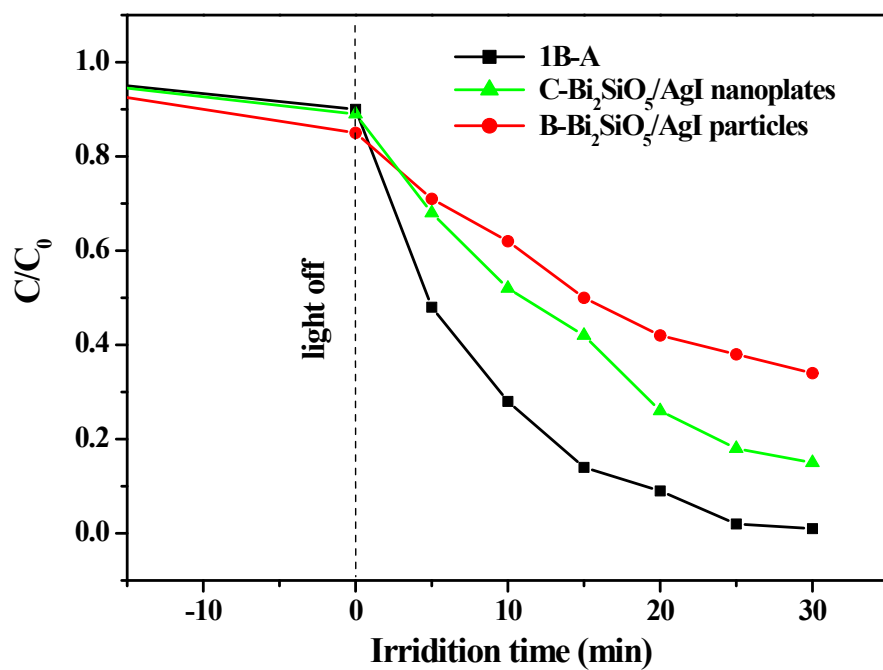

**Figure S4.** Photocatalytic activities of the Bi<sub>2</sub>SiO<sub>5</sub>/AgI nanoplates (1B-A), C-Bi<sub>2</sub>SiO<sub>5</sub>/AgI nanoplates and B-Bi<sub>2</sub>SiO<sub>5</sub>/AgI particles for ARG degradation under visible light irradiation.
